# Supplementary material for: Variation in Wolbachia cidB gene, but not cidA, is associated with cytoplasmic incompatibility mod phenotype diversity in Culex pipiens
Source: PubMed Central journal article supplement — Mol Ecol. 2019 Oct 15;28(21):4725–36. doi: 10.1111/mec.15252 (PMC6899686; doi:10.1111/mec.15252), 2019-10-15
Supplement: MEC-28-4725-s003.pdf [file MEC-28-4725-s003.pdf]

## CidB positions (aa)

**CidB\_IV  
variants**

|     |     |     |   |   |   |     |   |   |     |   |     |   |     |     |
|-----|-----|-----|---|---|---|-----|---|---|-----|---|-----|---|-----|-----|
| 2 2 | 2 2 | 2 2 | 2 | 2 | 2 | 2 2 | 2 | 2 | 4 4 | 4 | 4 4 | 4 | 4 4 | 4 4 |
| 4 4 | 5 5 | 5 5 | 5 | 5 | 6 | 6-7 | 7 | 7 | 5 5 | 5 | 6-6 | 7 | 7 7 | 7-8 |
| 2 3 | 0 1 | 3 4 | 7 | 9 | 2 | 8 0 | 6 | 8 | 2 3 | 9 | 2 6 | 2 | 5 6 | 9 1 |

|        |    |    |    |   |   |   |     |   |   |    |   |       |   |    |     |
|--------|----|----|----|---|---|---|-----|---|---|----|---|-------|---|----|-----|
| (a/1)  | DR | RI | RE | P | I | I | QVL | N | N | EY | G | RVRVR | Y | GD | RHT |
| (a/2)  | DR | RI | RE | P | I | I | QVL | N | N | EY | * | EAPIT | H | EG | **C |
| (a/3)  | DR | RI | RE | P | I | I | QVL | N | N | HP | * | EAPIT | H | EG | **C |
| (b/1)  | NQ | SL | GD | E | V | T | AQI | G | S | EY | G | RVRVR | Y | GD | RHT |
| (b/2)  | NQ | SL | GD | E | V | T | AQI | G | S | EY | * | EAPIT | H | EG | **C |
| (b/3)  | NQ | SL | GD | E | V | T | AQI | G | S | HP | * | EAPIT | H | EG | **C |
| (c/1)† | NQ | SL | GD | E | V | T | AQI | N | N | EY | G | RVRVR | Y | GD | RHT |
| (c/3)† | NQ | SL | GD | E | V | T | AQI | N | N | HP | * | EAPIT | H | EG | **C |

Upstream polymorphic region

Downstream polymorphic region
